# Supplementary material for: Rapidly increasing sulfate concentration: a hidden promoter of eutrophication in shallow lakes
Source: Copernicus journal article supplement (doi:10.5194/bg-19-4351-2022), 2022-09-14
Supplement: Supplementary file 2 [file Fig.S2.docx]

Figure S2. Dynamic change of TOC in the water column during the incubation
