# Supplementary material for: Rapidly increasing sulfate concentration: a hidden promoter of eutrophication in shallow lakes
Source: Copernicus journal article supplement (doi:10.5194/bg-19-4351-2022), 2022-09-14
Supplement: Supplementary file [file bg-19-4351-2022-supplement-title-page.pdf › bg-19-4351-2022-supplement-title-page.pdf]

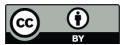

## *Supplement of*

# **Rapidly increasing sulfate concentration: a hidden promoter of eutrophication in shallow lakes**

**Chuanqiao Zhou et al.**

*Correspondence to:* Xiaoguang Xu (xxg05504118@163.com)

- [bg-19-4351-2022-supplement-title-page.pdf](#)
- [supplement](#)
  - [Fig.S1.docx](#)
  - [Fig.S2.docx](#)
  - [Fig.S3.docx](#)
  - [Fig.S4.docx](#)
  - [Fig.S5.docx](#)

The copyright of individual parts of the supplement might differ from the article licence.
