# Supplementary figures and images for: Rapidly increasing sulfate concentration: a hidden promoter of eutrophication in shallow lakes
Source: Copernicus journal article supplement (doi:10.5194/bg-19-4351-2022), 2022-09-14

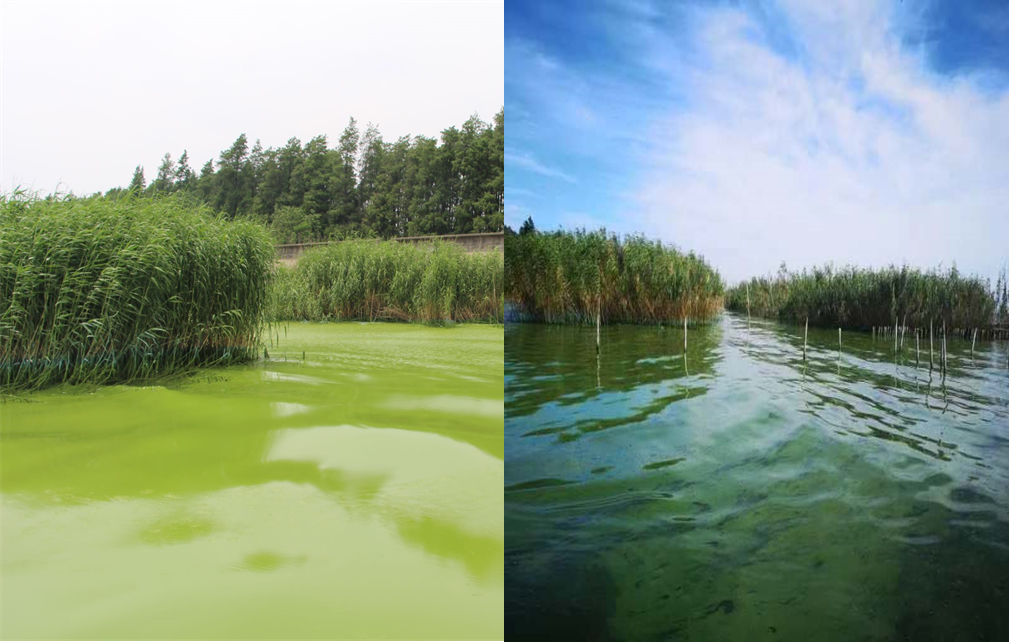


Figure S3. Sampling sites on the Lake Taihu

Supplement: Supplementary file 3 [file Fig.S3.docx]

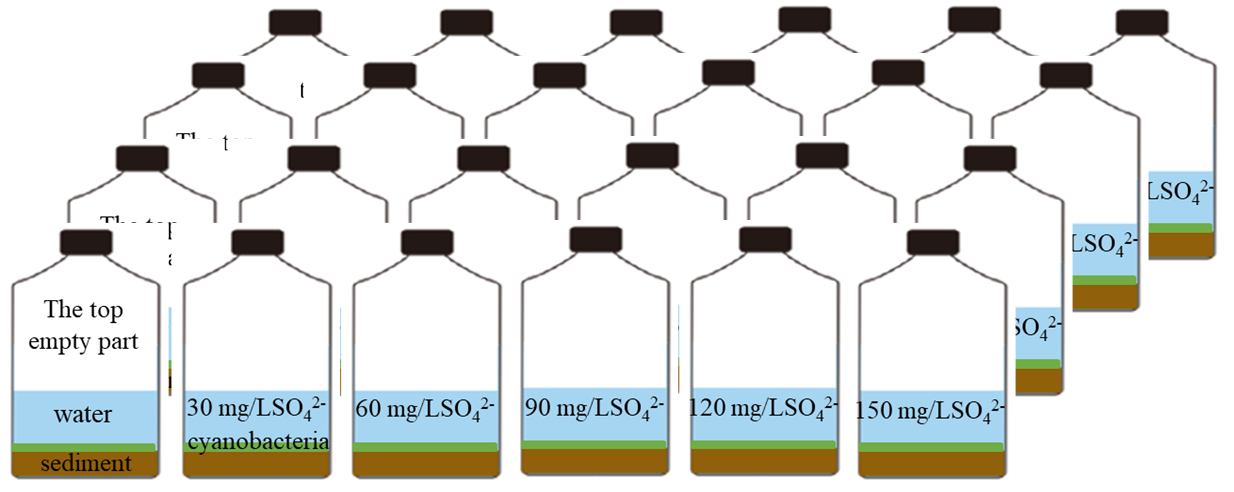


Figure S4. Schematic diagrams of experimental groups

Supplement: Supplementary file 4 [file Fig.S4.docx]

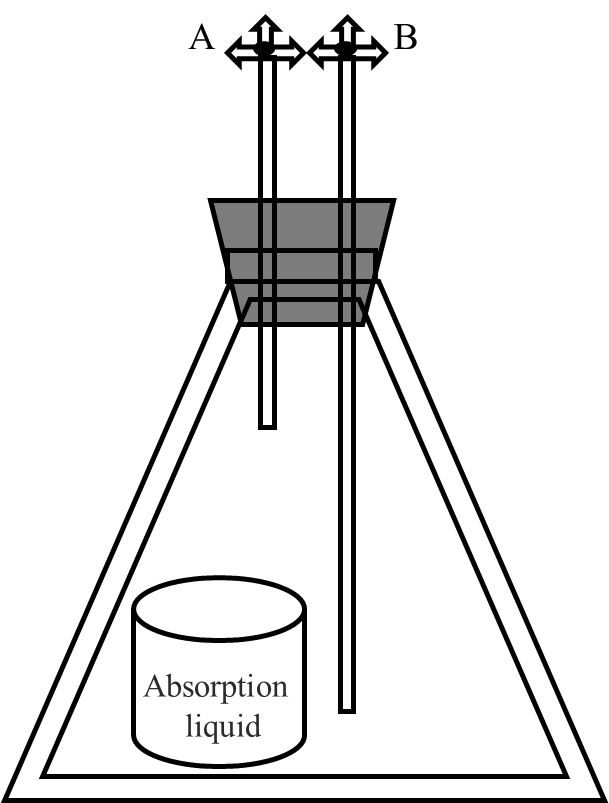


Figure S5. Schematic diagram of sediment cold diffusion classification extraction device

Supplement: Supplementary file 5 [file Fig.S5.docx]
